# Supplementary material for: MALDI imaging reveals NCOA7 as a potential biomarker in oral squamous cell carcinoma arising from oral submucous fibrosis
Source: PubMed Central journal article supplement (PMC5312364; doi:10.18632/oncotarget.11046), 2016-08-04
Supplement: oncotarget-07-59987-s001.pdf [file oncotarget-07-59987-s001.pdf]

## MALDI imaging reveals NCOA7 as a potential biomarker in oral squamous cell carcinoma arising from oral submucous fibrosis

### SUPPLEMENTARY FIGURE

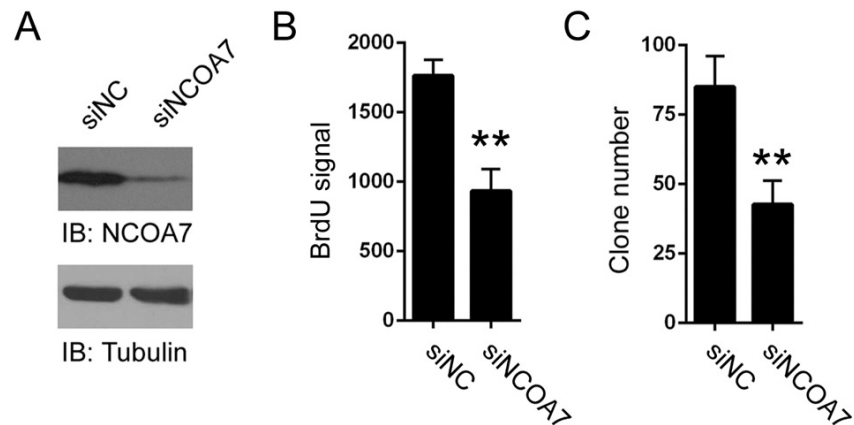

**Supplementary Figure S1:** **A.** HSC-4 cells were treated with siNC or siNCOA7, and expression of NCOA7 was examined by western blot. **B.** HSC-4 cells were treated with siNC or siNCOA7, and proliferation HSC-4 cells were examined by BrdU labeling assay. **C.** HSC-4 cells were treated with siNC or siNCOA7, and proliferation HSC-4 cells were examined by colony formation assay. All data were representative of at least three independent experiments. \*\*,  $P < 0.01$ .
